# Supplementary material for: Infection phenotypes of a coevolving parasite are highly diverse, structured, and specific
Source: PubMed Central journal article supplement (PMC9290032; doi:10.1111/evo.14323), 2021-08-30
Supplement: EVO-75-2540-s001.pdf [file EVO-75-2540-s001.pdf]

a.

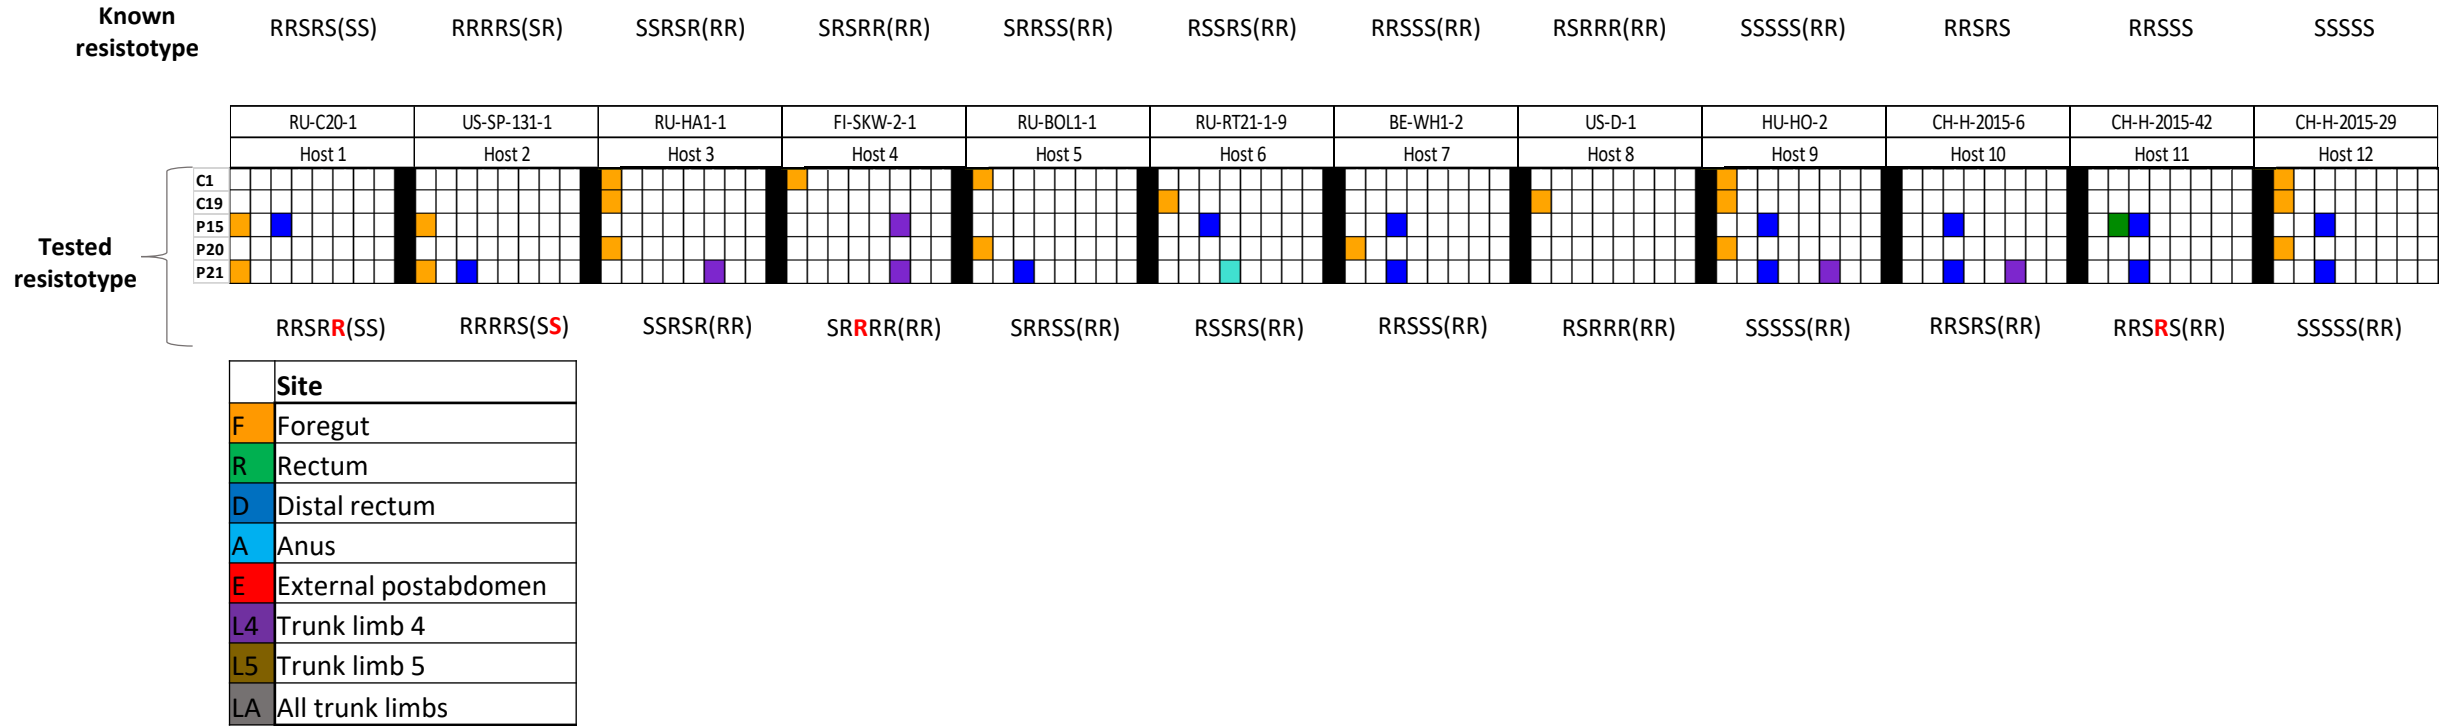

b.

| Effect          | Percent variance |      |      |      |      |      |      |      |      |
|-----------------|------------------|------|------|------|------|------|------|------|------|
|                 | all              | F    | D    | E    | L4   | L5   | R    | A    | LA   |
| host            | 6.1              | 0    | 14   | 0.04 | 0    | 2.9  | 12   | 0    | 0    |
| parasite        | 31.7             | 0    | 56   | 94.9 | 4.3  | 90.4 | 41.9 | 0    | 0    |
| host x parasite | 47               | 97.4 | 17.9 | 1    | 91.8 | 2.2  | 23.7 | 90.7 | 94.2 |
| residual        | 15.3             | 2.6  | 12.1 | 4.1  | 3.9  | 4.4  | 22.4 | 9.3  | 5.8  |
