# Supplementary material for: Infection phenotypes of a coevolving parasite are highly diverse, structured, and specific
Source: PubMed Central journal article supplement (PMC9290032; doi:10.1111/evo.14323), 2021-08-30

a.

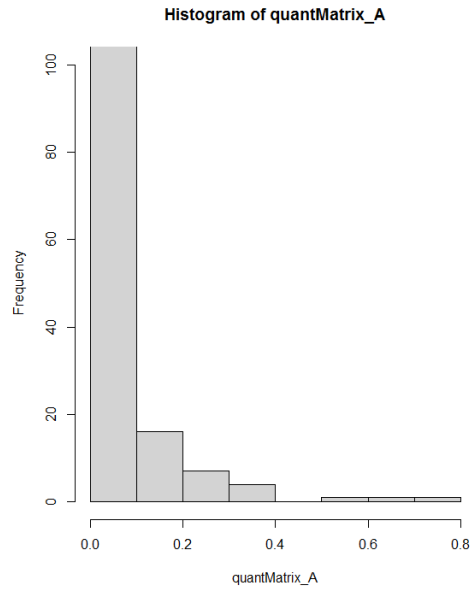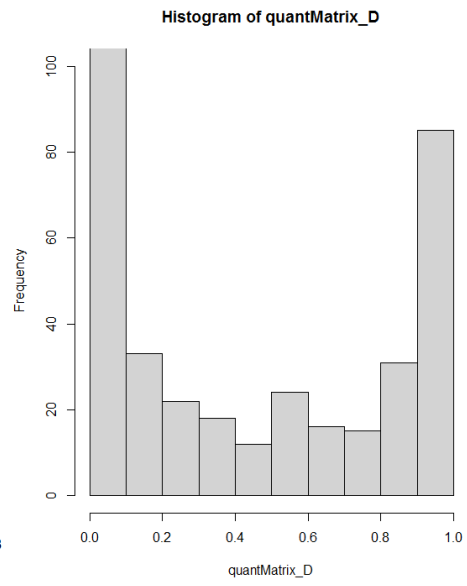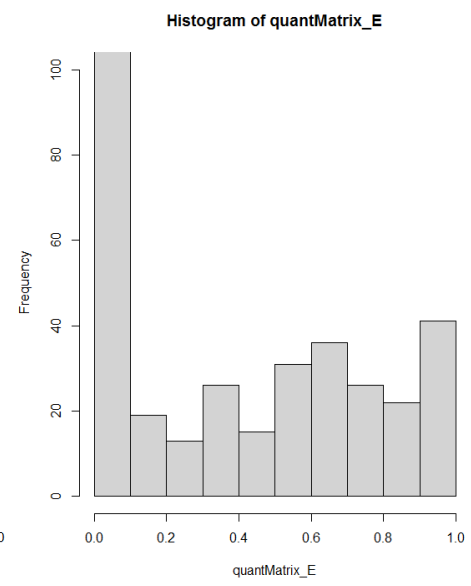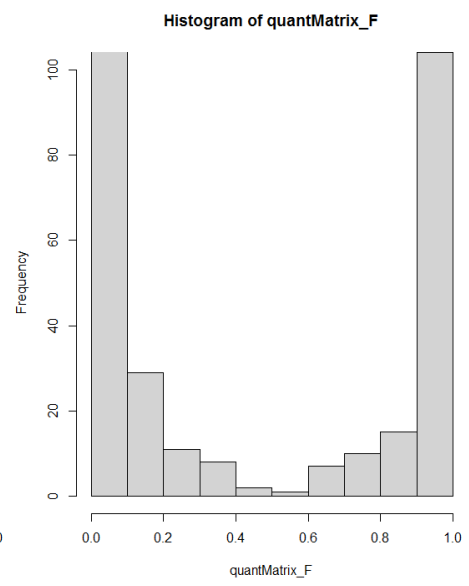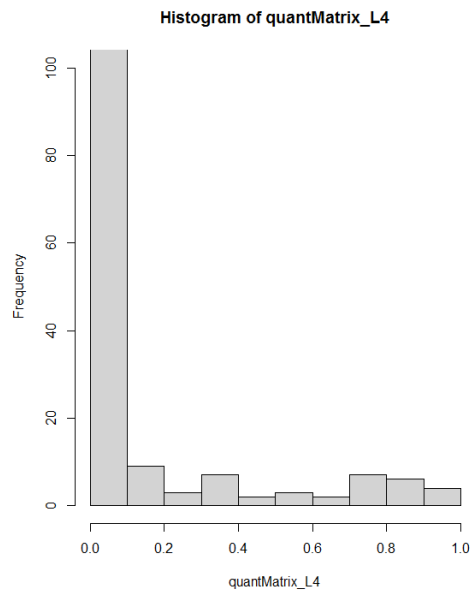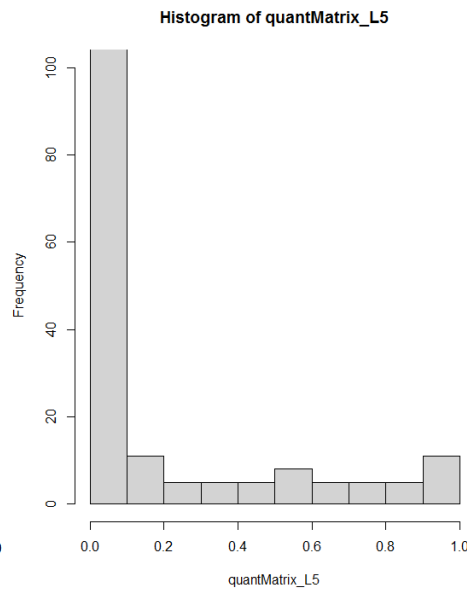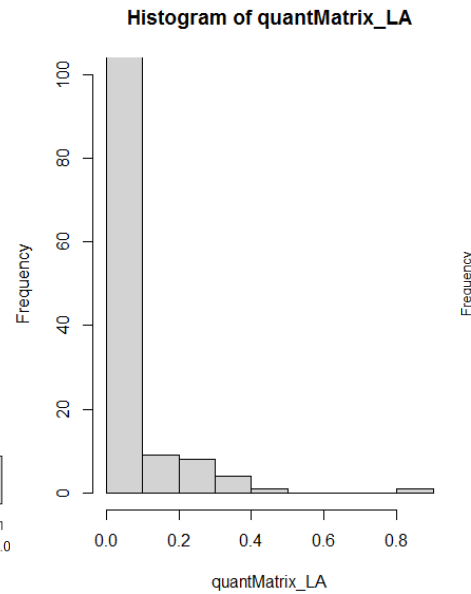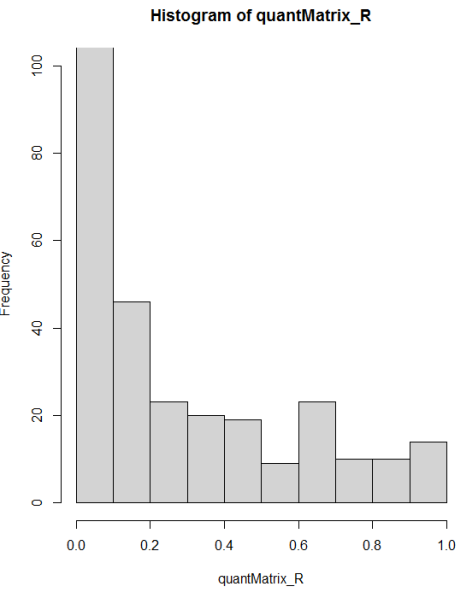

b.

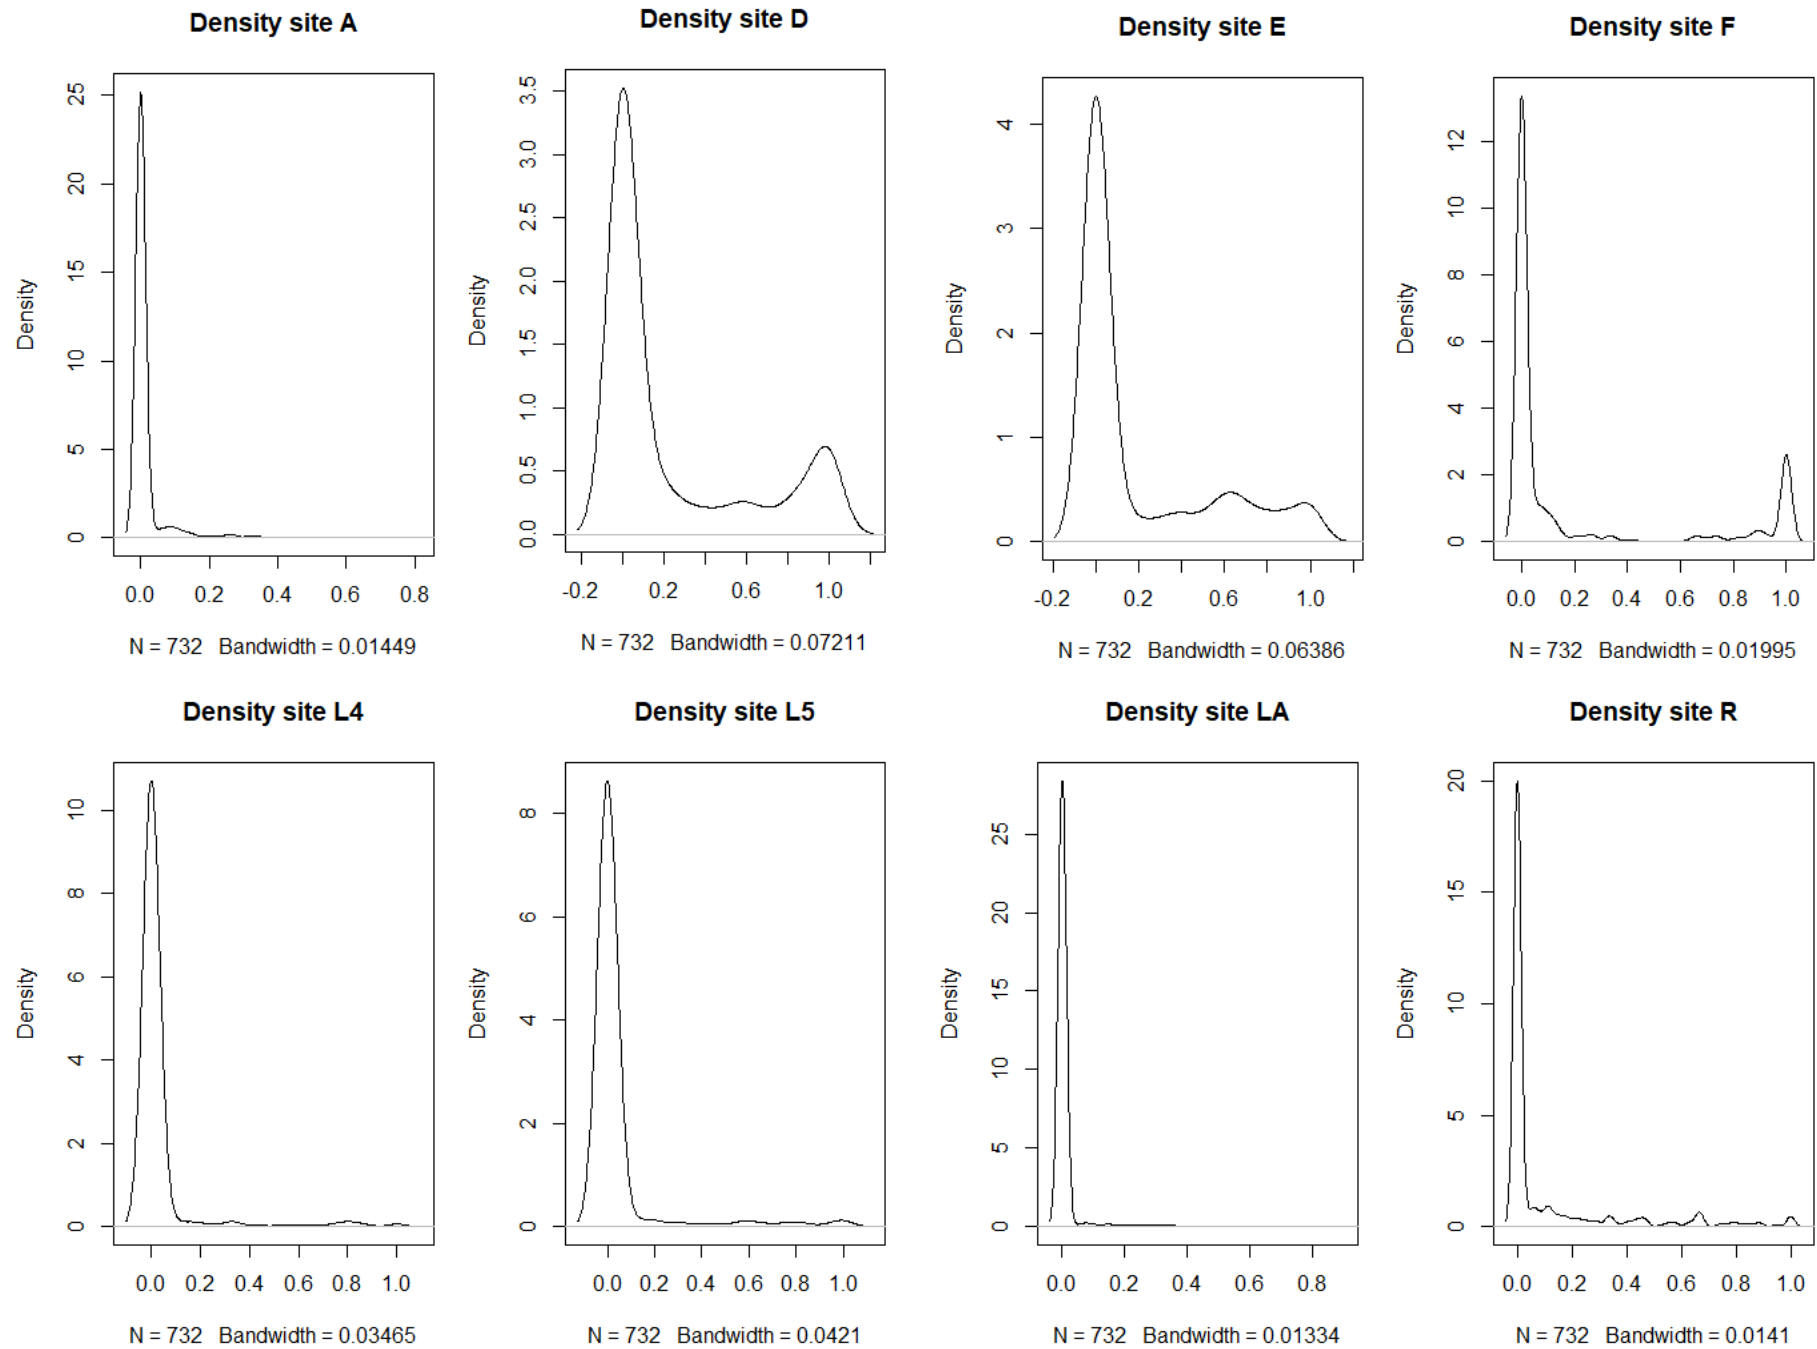

Supplement: EVO-75-2540-s002.pdf [file EVO-75-2540-s002.pdf]
