# Supplementary material for: Infection phenotypes of a coevolving parasite are highly diverse, structured, and specific
Source: PubMed Central journal article supplement (PMC9290032; doi:10.1111/evo.14323), 2021-08-30

a.

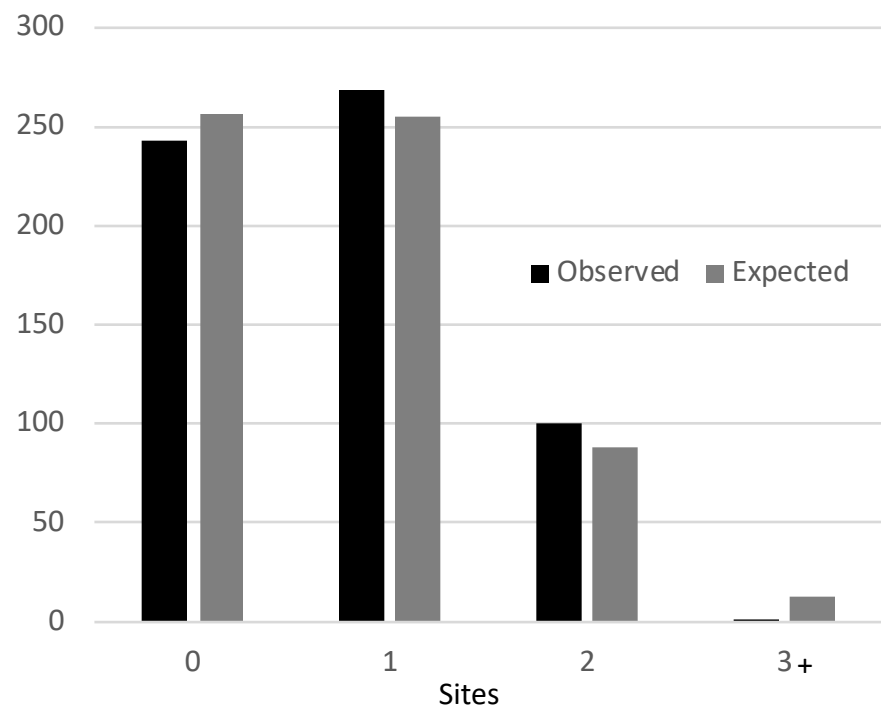

| Sites | Observed | Expected | Difference | Difference Sq. | Diff. Sq. / Exp Fr. |
|-------|----------|----------|------------|----------------|---------------------|
| 0     | 243      | 256      | -13.00     | 169.00         | 0.66                |
| 1     | 268      | 255      | 13.00      | 169.00         | 0.66                |
| 2     | 100      | 88       | 12.00      | 144.00         | 1.64                |
| 3+    | 1        | 13       | -12.00     | 144.00         | 11.08               |

$\chi^2 = 14.036$   
 $p = 0.00286$

b.

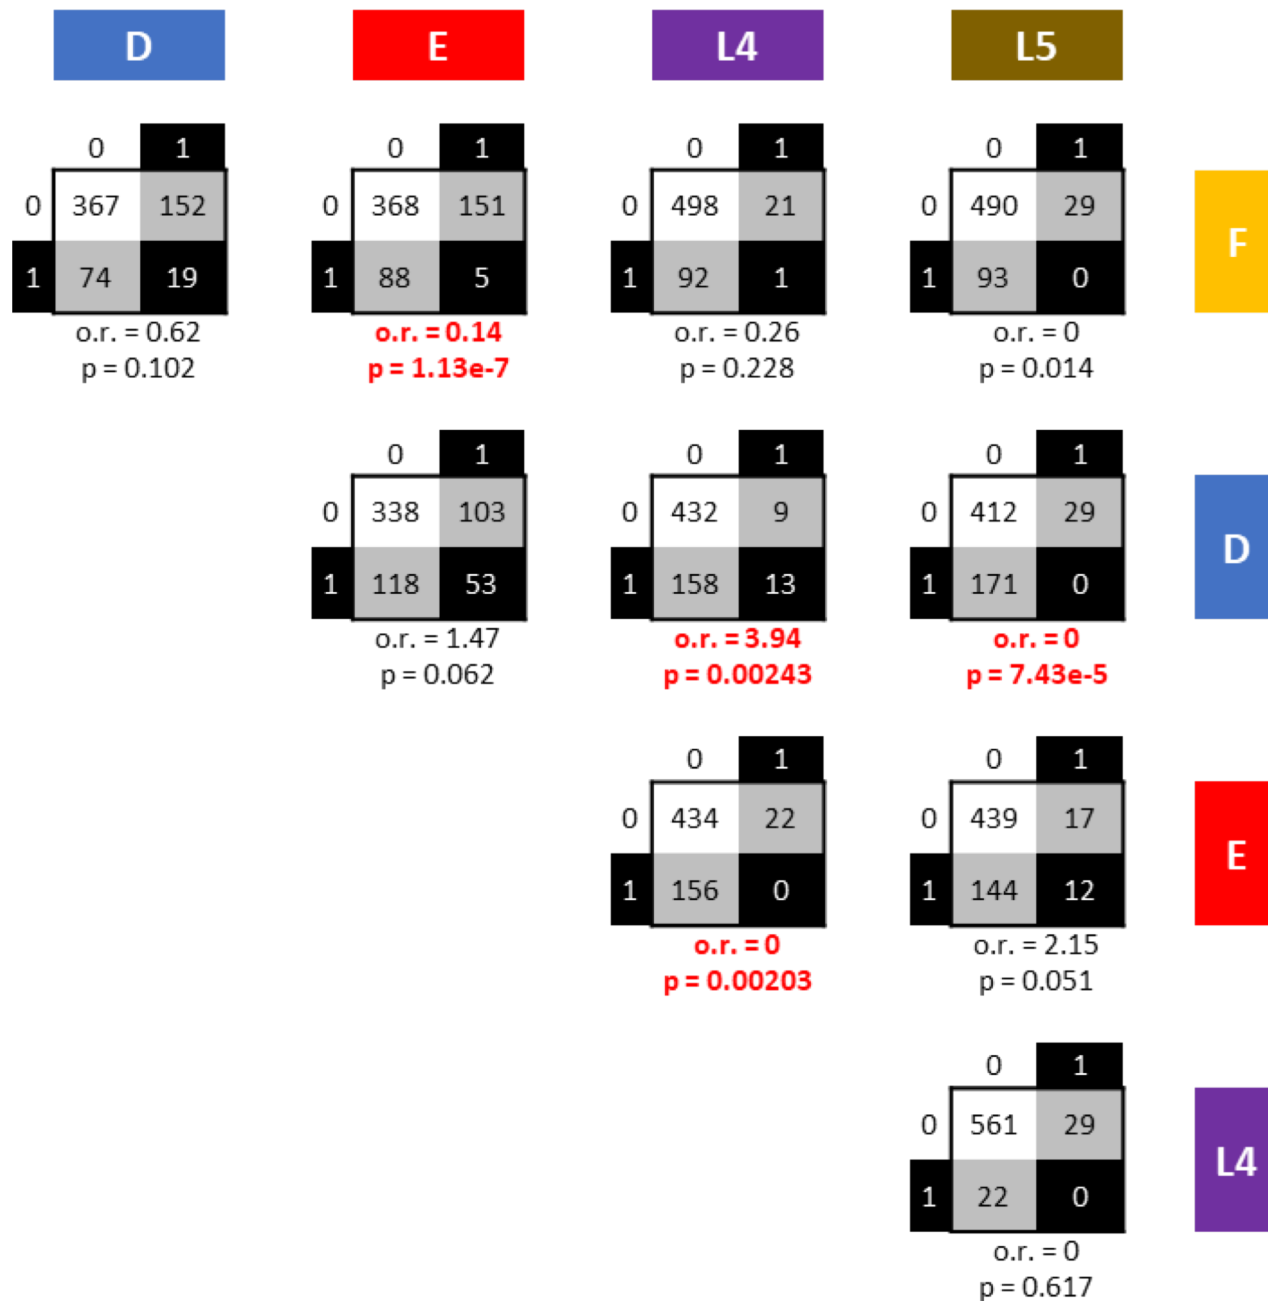

Supplement: EVO-75-2540-s006.pdf [file EVO-75-2540-s006.pdf]
