# Supplementary material for: Infection phenotypes of a coevolving parasite are highly diverse, structured, and specific
Source: PubMed Central journal article supplement (PMC9290032; doi:10.1111/evo.14323), 2021-08-30
Supplement: EVO-75-2540-s007.pdf [file EVO-75-2540-s007.pdf]

test jars

positive control

unexposed

For each host/parasite combination:

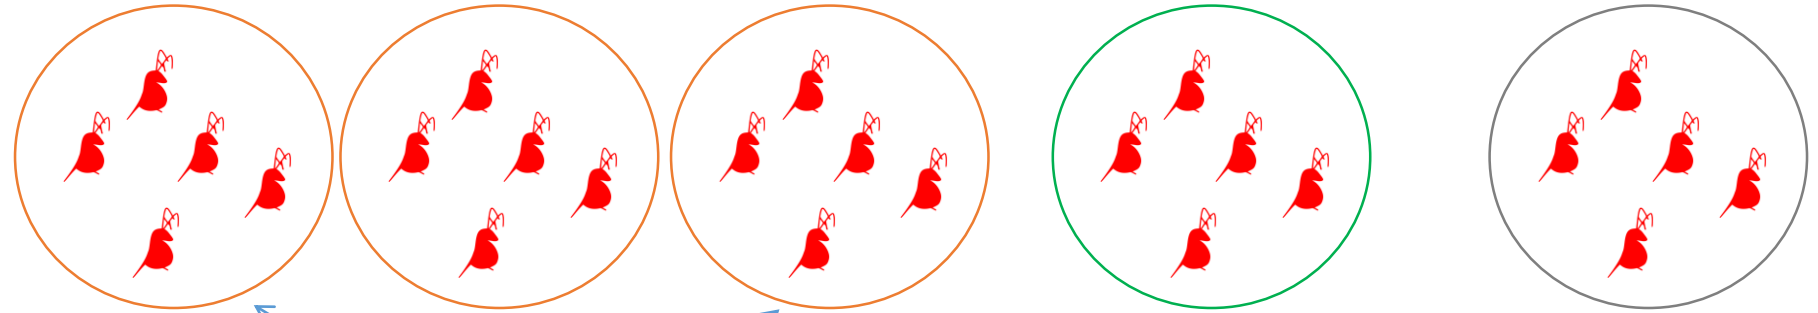

150 K (2 x 75 K)  
spores per animal

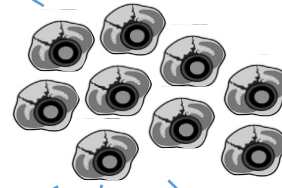

- All hosts were 3 – 5 days old at exposure.
- 100-mL jars were used throughout the experiment

For four host/parasite combinations:

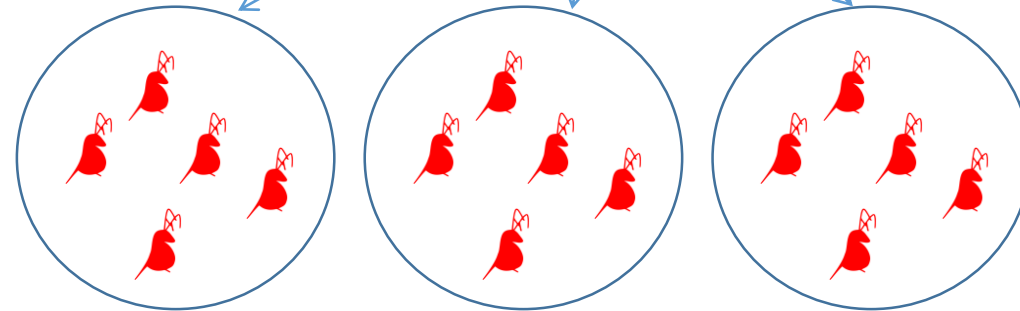

resistant
