# Supplementary material for: Infection phenotypes of a coevolving parasite are highly diverse, structured, and specific
Source: PubMed Central journal article supplement (PMC9290032; doi:10.1111/evo.14323), 2021-08-30
Supplement: EVO-75-2540-s011.pdf [file EVO-75-2540-s011.pdf]

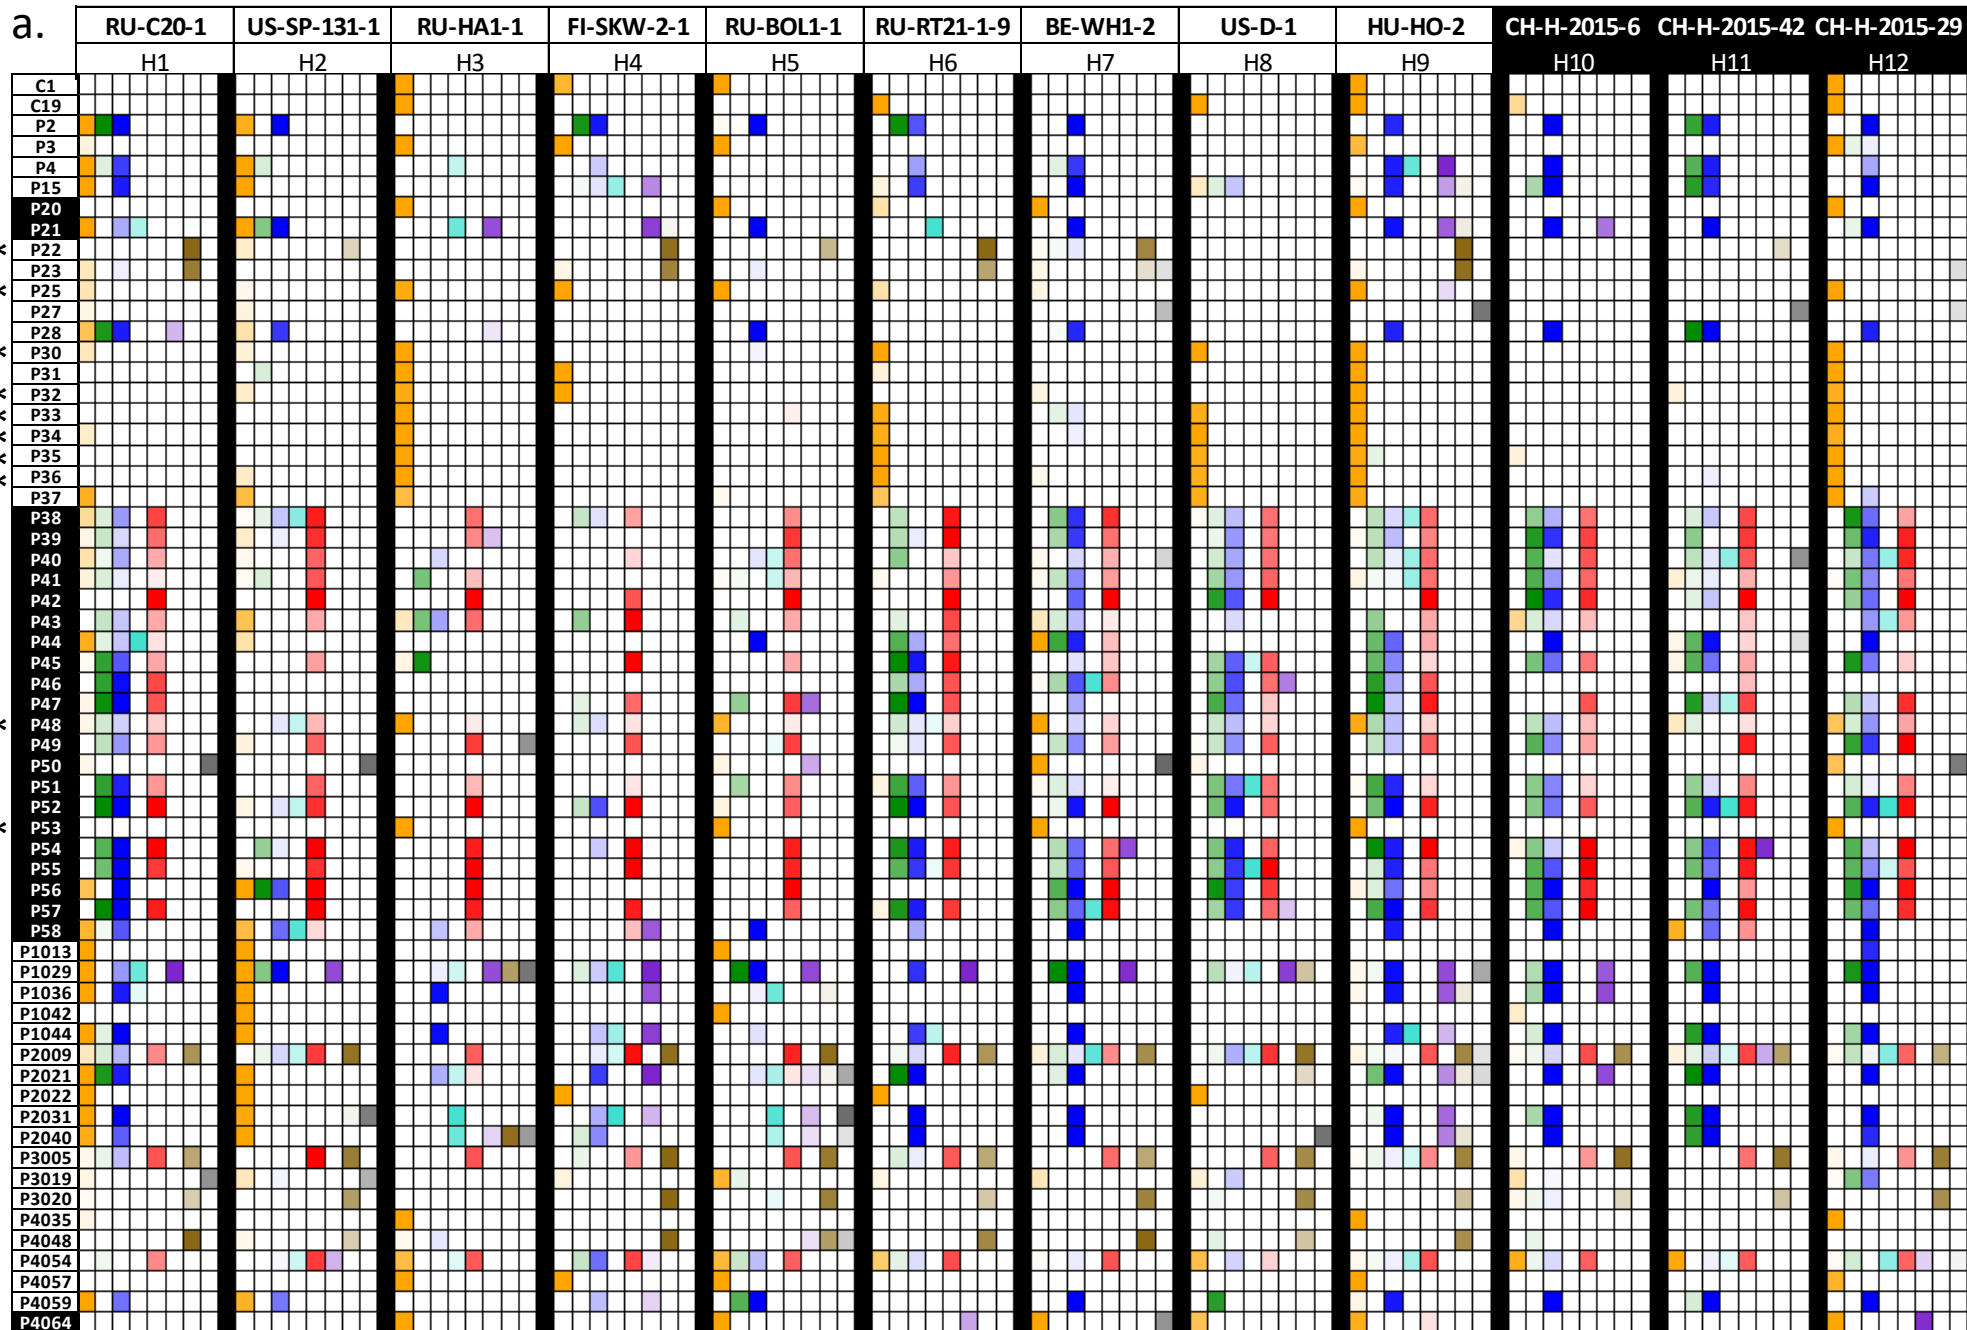

**b.**

|    | Site                 | count >0.5 | percent |
|----|----------------------|------------|---------|
| F  | Foregut              | 137        | 18.7    |
| R  | Rectum *             | 66         | 9.0     |
| D  | Distal hindgut       | 171        | 23.4    |
| A  | Anus *               | 3          | 0.4     |
| E  | External postabdomen | 156        | 21.3    |
| L4 | Trunk limb 4         | 22         | 3.0     |
| L5 | Trunk limb 5         | 34         | 4.6     |
| LA | All trunk limbs *    | 1          | 0.1     |

\* removed in final dataset

\* removed in final dataset
