# Supplementary material for: Infection phenotypes of a coevolving parasite are highly diverse, structured, and specific
Source: PubMed Central journal article supplement (PMC9290032; doi:10.1111/evo.14323), 2021-08-30
Supplement: EVO-75-2540-s014.pdf [file EVO-75-2540-s014.pdf]

a. Test

| treatment | attach_site | parasite_isolate | host_clone   | prop_infect | D    | A    | R    | F    | E    | L4   | L5   | LA   |
|-----------|-------------|------------------|--------------|-------------|------|------|------|------|------|------|------|------|
| test      | F           | P2031            | US-SP131-1   | 0.87        | 0.00 | 0.00 | 0.00 | 0.95 | 0.00 | 0.00 | 0.05 | 0.30 |
| test      | F           | P4064            | BE-WH1-2     | 0.93        | 0.00 | 0.00 | 0.00 | 1.00 | 0.00 | 0.00 | 0.00 | 0.36 |
| test      | D           | P21              | CH-H-2015-29 | 0.73        | 1.00 | 0.00 | 0.06 | 0.00 | 0.00 | 0.00 | 0.00 | 0.00 |
| test      | D           | P44              | CH-H-2015-42 | 1.00        | 0.96 | 0.00 | 0.63 | 0.04 | 0.17 | 0.00 | 0.00 | 0.04 |
| test      | E           | P38              | RU-RT21-1-9  | 0.47        | 0.00 | 0.00 | 0.25 | 0.00 | 0.90 | 0.00 | 0.00 | 0.00 |
| test      | E           | P38              | US-SP131-1   | 0.40        | 0.22 | 0.19 | 0.07 | 0.04 | 0.89 | 0.00 | 0.00 | 0.00 |
| test      | E           | P40              | CH-H-2015-42 | 0.87        | 0.10 | 0.20 | 0.25 | 0.00 | 0.65 | 0.00 | 0.00 | 0.14 |
| test      | E           | P4054            | BE-WH1-2     | 0.00        | 0.07 | 0.00 | 0.00 | 0.04 | 0.67 | 0.00 | 0.00 | 0.00 |
| test      | E           | P4054            | CH-H-2015-29 | 0.33        | 0.00 | 0.08 | 0.12 | 0.04 | 0.60 | 0.08 | 0.00 | 0.08 |
| test      | E           | P4054            | US-SP131-1   | 0.47        | 0.04 | 0.08 | 0.00 | 0.00 | 0.77 | 0.07 | 0.00 | 0.00 |
| test      | E           | P41              | HU-HO-2      | 0.93        | 0.04 | 0.07 | 0.04 | 0.11 | 0.56 | 0.00 | 0.00 | 0.00 |
| test      | E           | P41              | US-D-1       | 0.80        | 0.40 | 0.00 | 0.28 | 0.00 | 0.60 | 0.00 | 0.00 | 0.00 |
| test      | E           | P43              | RU-RT21-1-9  | 0.13        | 0.00 | 0.00 | 0.12 | 0.00 | 0.71 | 0.00 | 0.00 | 0.00 |
| test      | E           | P49              | RU-BOL1-1    | 0.20        | 0.00 | 0.04 | 0.00 | 0.00 | 0.74 | 0.00 | 0.00 | 0.00 |
| test      | E           | P49              | RU-HA1-1     | 0.00        | 0.00 | 0.00 | 0.00 | 0.00 | 0.77 | 0.00 | 0.00 | 0.07 |
| test      | E           | P57              | FI-SKW-2-1   | 1.00        | 0.00 | 0.00 | 0.00 | 0.00 | 0.88 | 0.00 | 0.00 | 0.00 |
| test      | L4          | P1029            | RU-HA1-1     | 0.00        | 0.05 | 0.09 | 0.00 | 0.00 | 0.00 | 0.82 | 0.05 | 0.09 |
| test      | L4          | P1036            | FI-SKW-2-1   | 0.33        | 0.00 | 0.00 | 0.00 | 0.00 | 0.00 | 0.78 | 0.00 | 0.00 |
| test      | L4          | P1044            | FI-SKW-2-1   | 0.67        | 0.19 | 0.13 | 0.00 | 0.00 | 0.00 | 0.88 | 0.00 | 0.00 |
| test      | L4          | P15              | FI-SKW-2-1   | 0.20        | 0.08 | 0.14 | 0.03 | 0.00 | 0.00 | 0.54 | 0.00 | 0.00 |
| test      | L4          | P21              | FI-SKW-2-1   | 0.27        | 0.00 | 0.00 | 0.00 | 0.00 | 0.00 | 0.88 | 0.06 | 0.00 |
| test      | L4          | P21              | RU-HA1-1     | 0.07        | 0.00 | 0.27 | 0.00 | 0.00 | 0.00 | 0.80 | 0.00 | 0.00 |
| test      | L5          | P2009            | RU-C20-1     | 0.80        | 0.28 | 0.00 | 0.16 | 0.25 | 0.47 | 0.00 | 0.72 | 0.00 |
| test      | L5          | P22              | FI-SKW-2-1   | 0.93        | 0.00 | 0.00 | 0.00 | 0.00 | 0.00 | 0.00 | 0.94 | 0.00 |
| test      | L5          | P22              | RU-RT21-1-9  | 0.67        | 0.00 | 0.00 | 0.00 | 0.00 | 0.00 | 0.00 | 1.00 | 0.00 |
| test      | L5          | P23              | BE-WH1-2     | 0.80        | 0.00 | 0.00 | 0.00 | 0.09 | 0.00 | 0.00 | 0.22 | 0.10 |
| test      | L5          | P3005            | FI-SKW-2-1   | 0.73        | 0.00 | 0.00 | 0.07 | 0.00 | 0.40 | 0.00 | 1.00 | 0.00 |
| test      | L5          | P3020            | RU-BOL1-1    | 0.80        | 0.00 | 0.04 | 0.00 | 0.00 | 0.00 | 0.00 | 0.58 | 0.00 |
| test      | L5          | P3020            | US-D-1       | 0.47        | 0.00 | 0.00 | 0.05 | 0.00 | 0.00 | 0.00 | 0.55 | 0.00 |
| test      | L5          | P3020            | US-SP131-1   | 0.07        | 0.00 | 0.00 | 0.00 | 0.00 | 0.00 | 0.00 | 0.45 | 0.00 |
| test      | L5          | P4048            | RU-BOL1-1    | 0.80        | 0.00 | 0.00 | 0.00 | 0.00 | 0.00 | 0.07 | 0.45 | 0.14 |
| test      | L5          | P4048            | RU-C20-1     | 0.47        | 0.00 | 0.00 | 0.00 | 0.00 | 0.00 | 0.00 | 1.00 | 0.00 |

b. Positive control

| parasite_isolate | host_clone    | prop_infect | F    | R    | D    | A    | E    | L4   | L5   | LA   |
|------------------|---------------|-------------|------|------|------|------|------|------|------|------|
| P1029            | HU-HO-2       | 0.80        | 0.09 | 0.04 | 0.96 | 0.00 | 0.00 | 0.83 | 0.00 | 0.17 |
| P1036            | HU-HO-2       | 1.00        | 0.08 | 0.00 | 0.92 | 0.00 | 0.00 | 0.77 | 0.15 | 0.00 |
| P1044            | HU-HO-2       | 1.00        | 0.00 | 0.00 | 0.87 | 0.13 | 0.00 | 0.33 | 0.00 | 0.00 |
| P15              | HU-HO-2       | 1.00        | 0.05 | 0.00 | 0.86 | 0.00 | 0.00 | 0.45 | 0.09 | 0.00 |
| P2009            | HU-HO-2       | 1.00        | 0.10 | 0.03 | 0.03 | 0.00 | 0.66 | 0.00 | 0.79 | 0.06 |
| P2021            | HU-HO-2       | 0.80        | 0.00 | 0.44 | 0.97 | 0.00 | 0.00 | 0.54 | 0.16 | 0.08 |
| P2031            | HU-HO-2       | 1.00        | 0.00 | 0.05 | 1.00 | 0.00 | 0.00 | 0.68 | 0.00 | 0.00 |
| P2040            | HU-HO-2       | 1.00        | 0.00 | 0.00 | 1.00 | 0.00 | 0.00 | 0.59 | 0.18 | 0.00 |
| P21              | HU-HO-2       | 1.00        | 0.00 | 0.00 | 0.93 | 0.00 | 0.00 | 0.73 | 0.13 | 0.00 |
| P22              | HU-HO-2       | 1.00        | 0.00 | 0.00 | 0.00 | 0.00 | 0.00 | 0.00 | 1.00 | 0.00 |
| P23              | HU-HO-2       | 0.80        | 0.09 | 0.00 | 0.00 | 0.00 | 0.00 | 0.00 | 0.96 | 0.00 |
| P3005            | HU-HO-2       | 1.00        | 0.03 | 0.06 | 0.06 | 0.03 | 0.45 | 0.00 | 0.82 | 0.00 |
| P3020            | DE-K35-linb1  | 1.00        | 0.07 | 0.00 | 0.00 | 0.00 | 0.00 | 0.00 | 0.80 | 0.00 |
| P38              | t1_10.3_2i_2  | 0.20        | 0.08 | 0.65 | 0.81 | 0.04 | 0.58 | 0.00 | 0.00 | 0.00 |
| P40              | t1_10.3_2i_6  | 0.80        | 0.04 | 0.88 | 0.79 | 0.00 | 0.83 | 0.00 | 0.00 | 0.00 |
| P4048            | HU-HO-2       | 1.00        | 0.00 | 0.00 | 0.00 | 0.00 | 0.00 | 0.00 | 0.74 | 0.00 |
| P4054            | HU-HO-2       | 1.00        | 0.06 | 0.03 | 0.06 | 0.06 | 0.68 | 0.00 | 0.00 | 0.00 |
| P4064            | HU-HO-2       | 0.80        | 0.89 | 0.00 | 0.00 | 0.00 | 0.11 | 0.00 | 0.00 | 0.00 |
| P41              | t1_10.3_2i_11 | 0.60        | 0.00 | 0.48 | 0.80 | 0.00 | 0.44 | 0.00 | 0.00 | 0.00 |
| P43              | t1_10.3_2     | 0.00        | 0.00 | 0.72 | 0.68 | 0.04 | 0.64 | 0.00 | 0.00 | 0.00 |
| P44              | PL-W2-1       | 0.40        | 0.92 | 0.00 | 0.08 | 0.15 | 0.15 | 0.00 | 0.00 | 0.00 |
| P47              | DE-G1-106-C   | 0.00        | 0.00 | 0.47 | 0.71 | 0.00 | 0.53 | 0.00 | 0.00 | 0.00 |
| P49              | US-D-1        | 0.80        | 0.03 | 0.18 | 0.43 | 0.00 | 0.63 | 0.00 | 0.00 | 0.00 |
| P57              | GB-EP-1-C     | 0.40        | 0.09 | 0.68 | 0.65 | 0.09 | 0.88 | 0.00 | 0.00 | 0.00 |

c. Resistant

| treatment | attach_site | parasite_isolate | host_clone  | prop_infect | D    | A    | R    | F    | E    | L4   | L5   | LA   |
|-----------|-------------|------------------|-------------|-------------|------|------|------|------|------|------|------|------|
| resistant |             | P1036            | RU-RT21-1-9 | 0.13        | 0.00 | 0.00 | 0.00 | 0.00 | 0.00 | 0.00 | 0.00 | 0.00 |
| resistant |             | P2031            | US-D-1      | 0.33        | 0.00 | 0.00 | 0.00 | 0.00 | 0.00 | 0.00 | 0.00 | 0.00 |
| resistant |             | P21              | US-D-1      | 0.13        | 0.00 | 0.00 | 0.00 | 0.00 | 0.00 | 0.00 | 0.00 | 0.00 |
| resistant |             | P4064            | US-SP131-1  | 0.00        | 0.00 | 0.00 | 0.00 | 0.00 | 0.00 | 0.00 | 0.00 | 0.00 |

0.01 – 0.5  
> 0.5
