# Supplementary material for: Infection phenotypes of a coevolving parasite are highly diverse, structured, and specific
Source: PubMed Central journal article supplement (PMC9290032; doi:10.1111/evo.14323), 2021-08-30
Supplement: EVO-75-2540-s015.pdf [file EVO-75-2540-s015.pdf]

a.

**F**

foregut

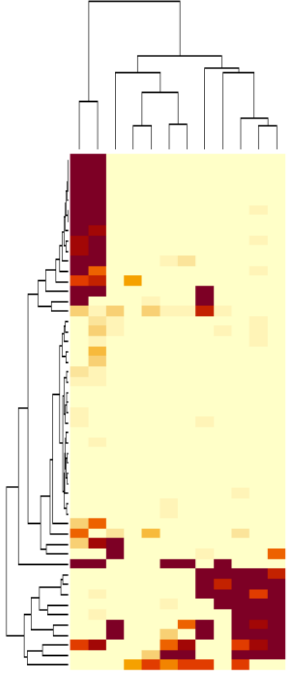

**D**

distal hindgut

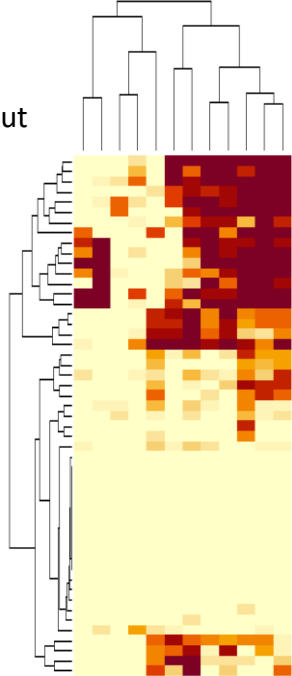

**E**

external  
postabdomen

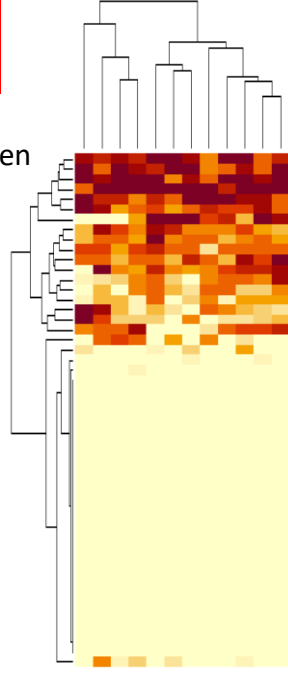

**L4**

trunk limb 4

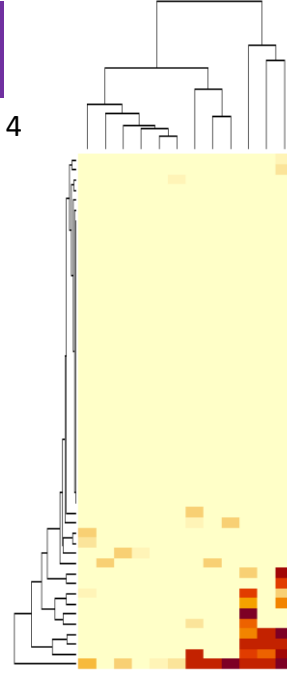

**L5**

trunk limb 5

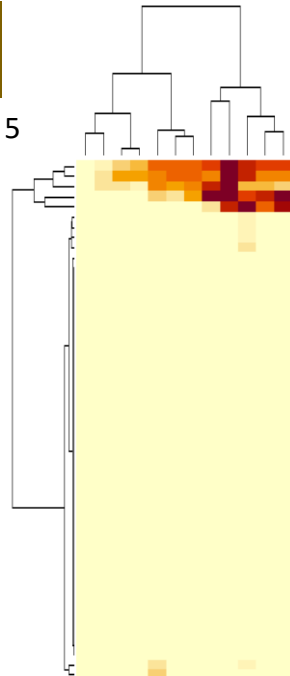

b.

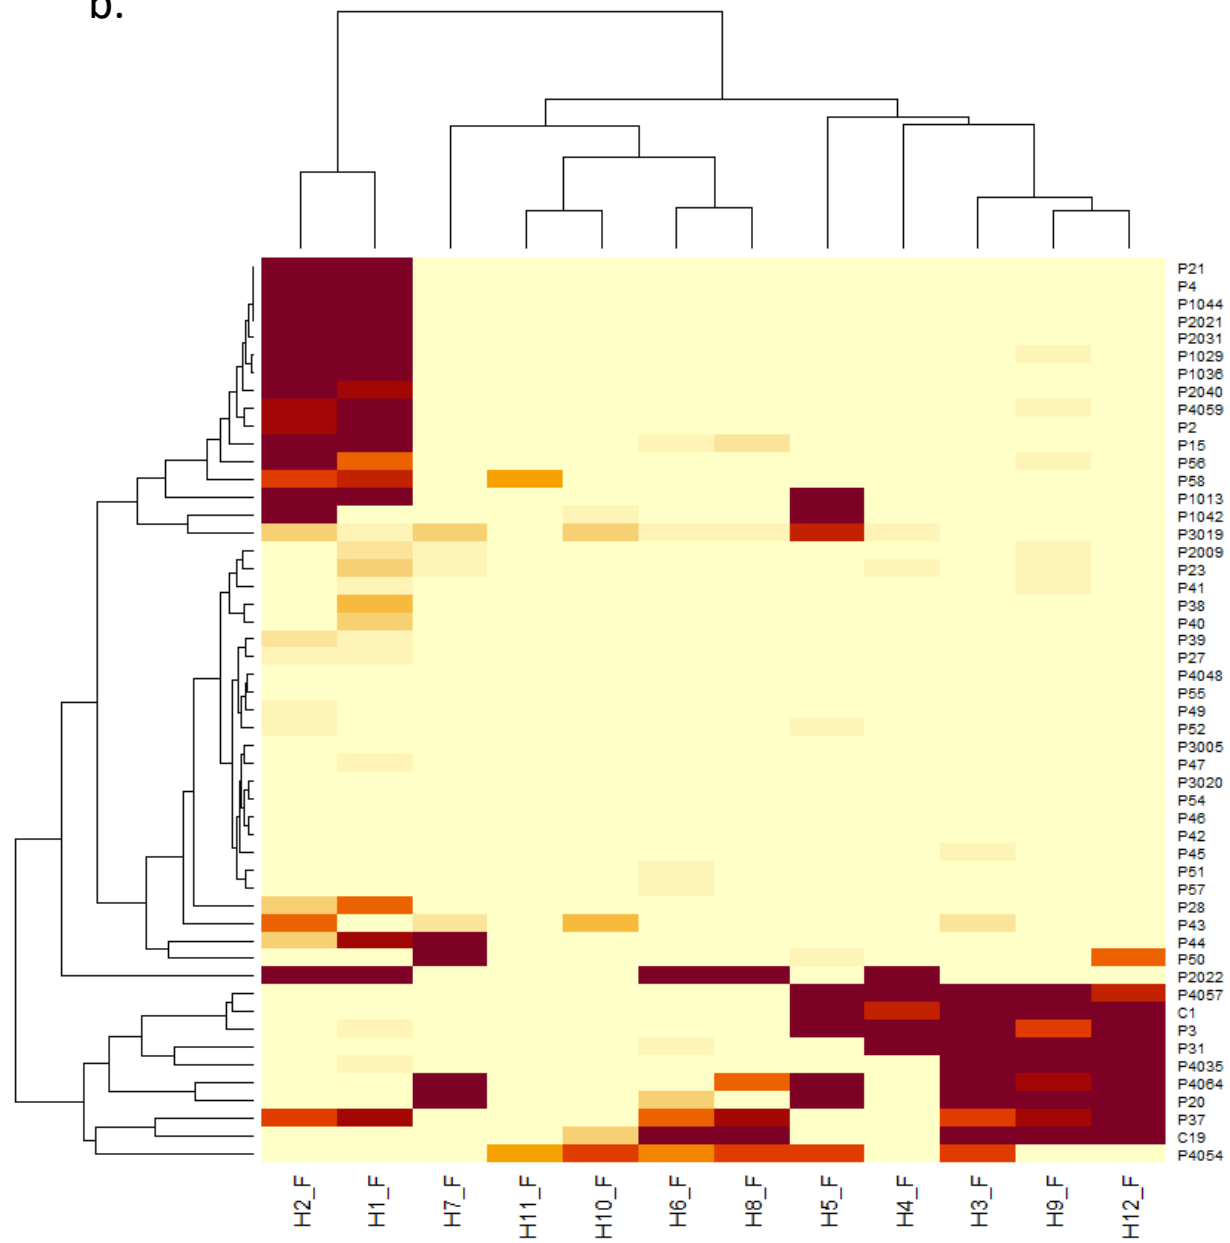

c.

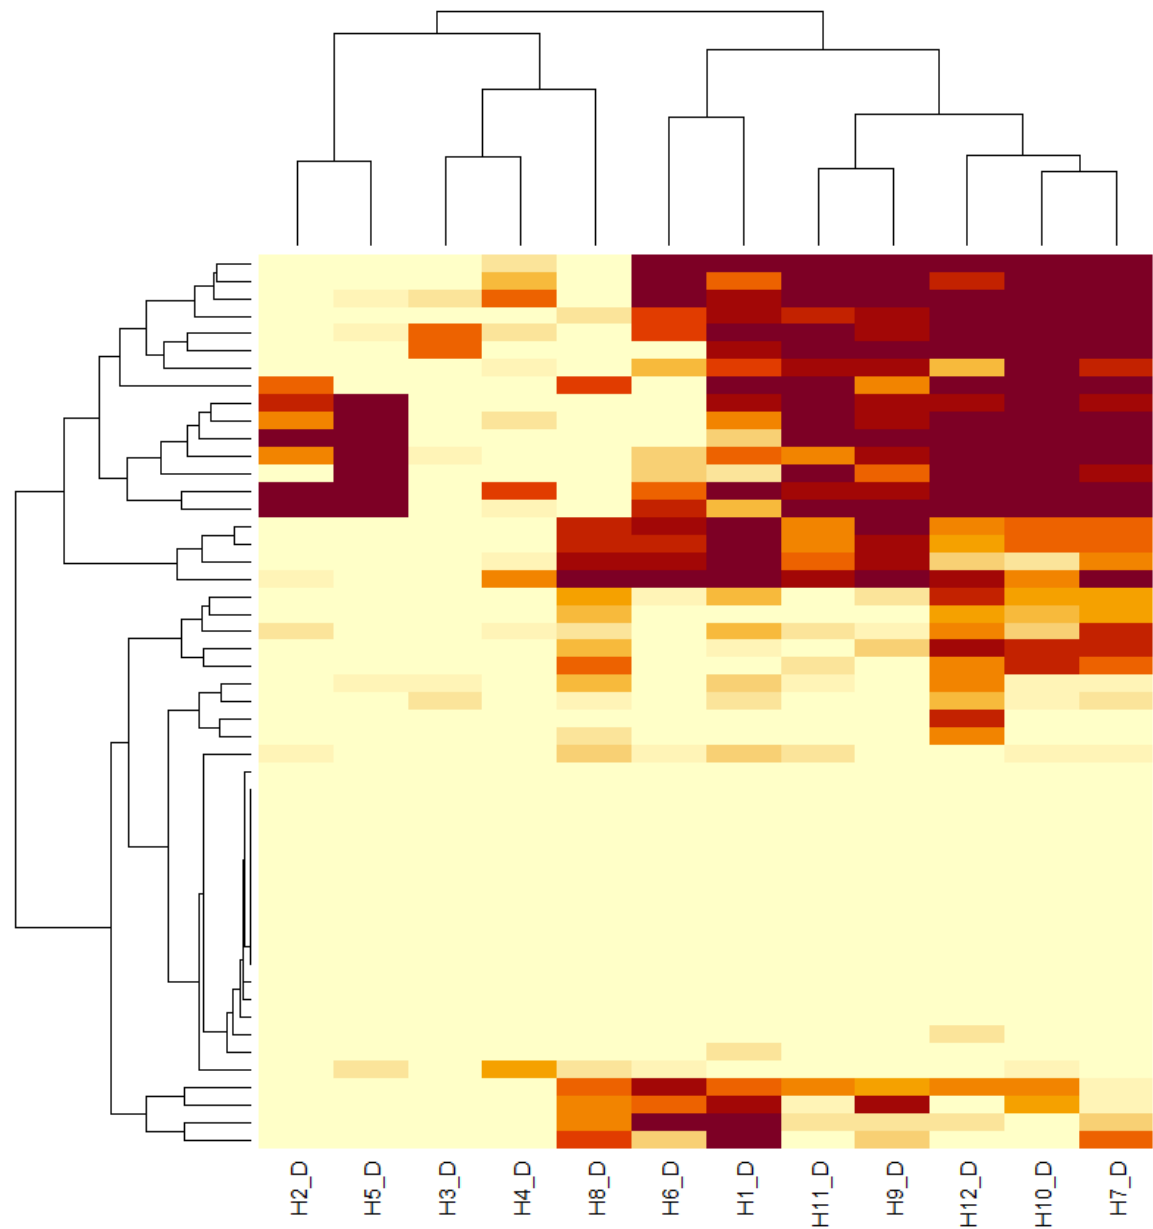

P2031  
P2040  
P2021  
P15  
P1044  
P1036  
P4  
P56  
P28  
P4059  
P21  
P58  
P44  
P2  
P1029  
P57  
P55  
P54  
P52  
P49  
P41  
P38  
P39  
P42  
P40  
P43  
P1013  
P3019  
P2009  
P3  
C19  
C1  
P20  
P27  
P31  
P50  
P1042  
P2022  
P4035  
P4057  
P4064  
P3020  
P4048  
P23  
P37  
P3005  
P4054  
P45  
P51  
P47  
P46

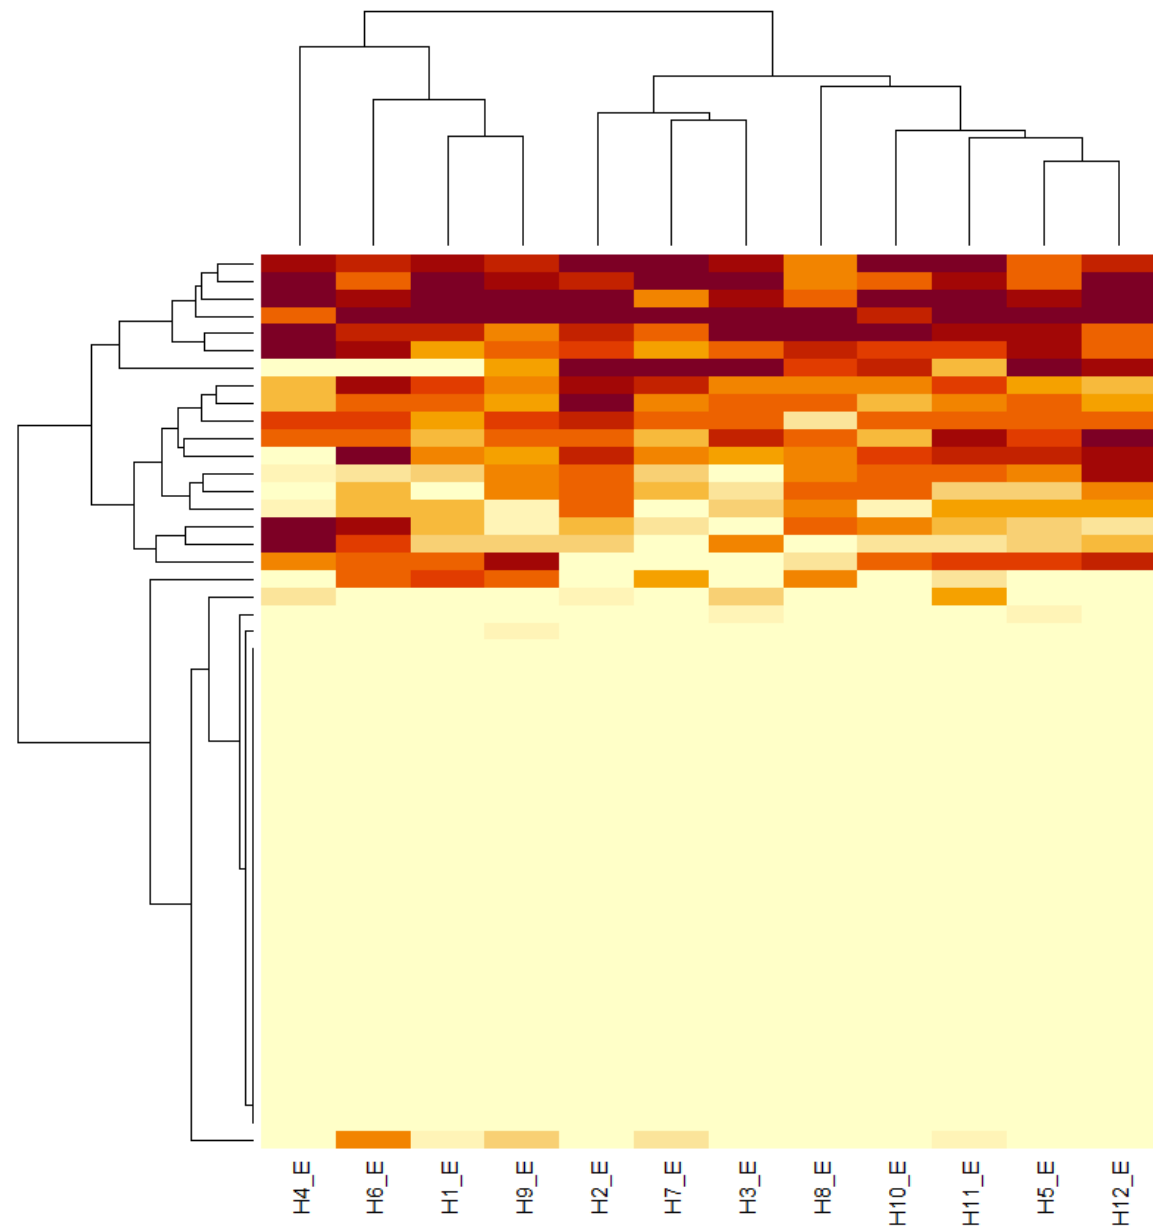

P57  
P52  
P54  
P42  
P55  
P2009  
P56  
P38  
P3005  
P4054  
P49  
P39  
P40  
P41  
P51  
P45  
P43  
P47  
P46  
P58  
P2021  
P4064  
C19  
C1  
P2  
P3  
P4  
P15  
P20  
P21  
P23  
P27  
P28  
P31  
P37  
P50  
P1013  
P1029  
P1036  
P1042  
P1044  
P2022  
P2031  
P2040  
P3019  
P3020  
P4035  
P4048  
P4057  
P4059  
P44
