# Supplementary material for: Infection phenotypes of a coevolving parasite are highly diverse, structured, and specific
Source: Evolution. 2021 Aug 30;75(10):2540–54. doi: 10.1111/evo.14323 (PMC9290032; doi:10.1111/evo.14323)
Supplement: Supplementary file 6 — Figure S6 Distinguishing attachment phenotypes R, D and R/D. [file EVO-75-2540-s004.pdf]

Figure 1 consists of four panels arranged in a 2x2 grid. The top row shows schematic diagrams of the wing disc, with the D (dorsal) compartment on the left and the R (ventral) compartment on the right. The bottom row shows corresponding fluorescence images of the wing disc, with the D and R/D compartments labeled. A scale bar of 200 μm is provided in the bottom right image.

[illegible]
